# Supplementary material for: A self-supported ultrathin plasmonic film for ultrafast optical switching
Source: Royal Society of Chemistry journal article supplement (doi:10.1039/d1na00761k), 2022-01-01
Supplement: d1na00761k1.pdf [file d1na00761k1.pdf]

## Supporting information

# Self-supported ultrathin ultrafast plasmonic optical switching

Jinghui Yang<sup>1,2</sup>, Yulan Fu<sup>1</sup>, and Xinping Zhang<sup>1\*</sup>

<sup>1</sup> Institute of Information Photonics Technology, Beijing University of Technology, Beijing, 100124, P. R. China.

<sup>2</sup> Modern Police Technology and Equipment Research Center, College of Police Equipment and Technology, China People's Police University, Langfang, 065000, P. R. China

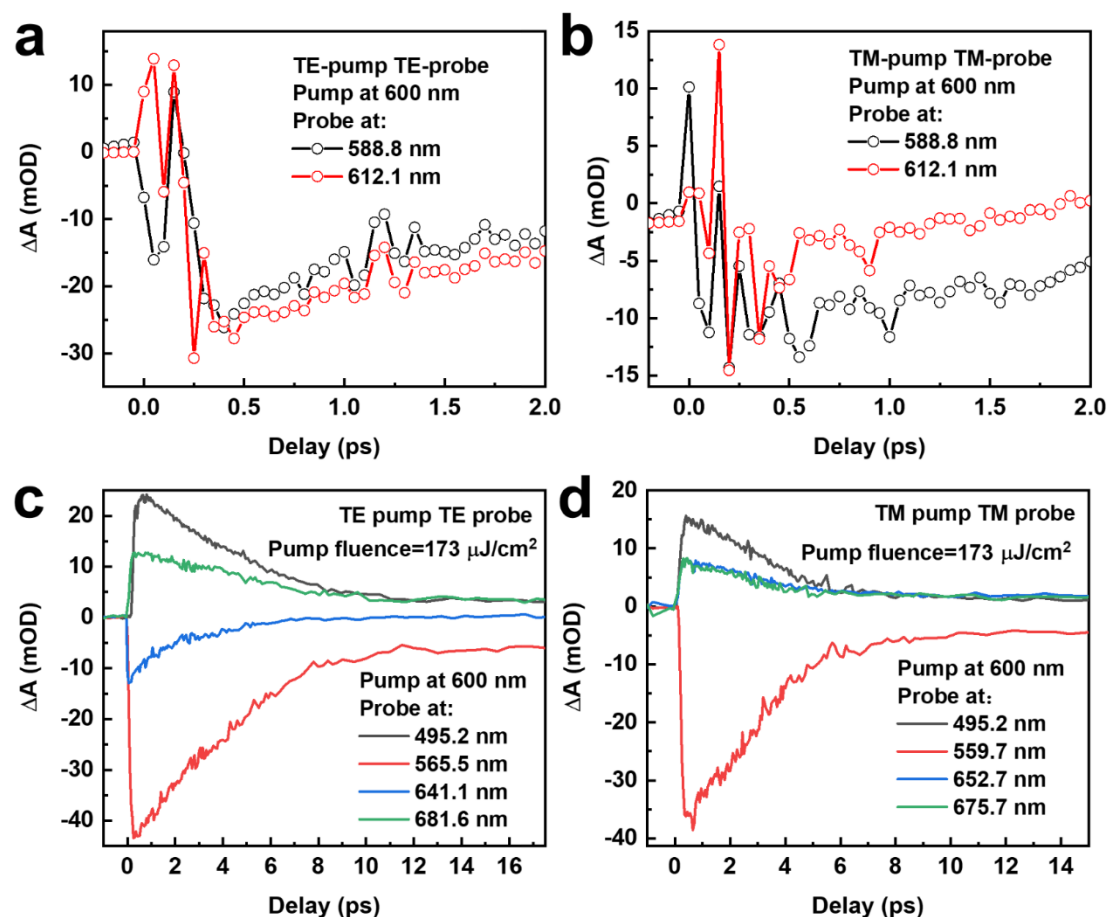

Figure S1 (a) TA dynamics at TE-probe wavelengths of 588.8 and 612.1 nm for TE-pumping at 600 nm. (b) TA dynamics at TM-probe wavelengths of 588.8 and 612.1 nm for TM-pumping at 600 nm. (c) TA dynamics at TE-probing at 495.2, 565.6, 641.1, and 681.6 nm for TE-pumping at 600 nm with a pump fluence of 173  $\mu\text{J}/\text{cm}^2$ . (d) TA dynamics at TM-probing at 495.2, 559.7, 652.7, and 675.7 nm for TM-pumping at 600

nm with a pump fluence of  $173 \mu\text{J}/\text{cm}^2$ .

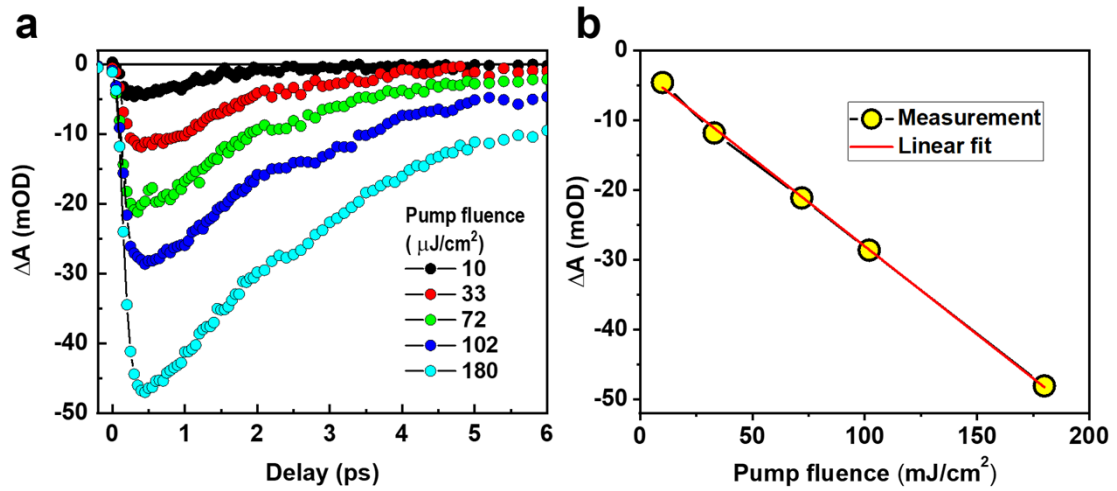

Figure S2 (a) TA dynamics for TM-pump at 600 nm and TM-probe at 553.8 nm as the pump fluence was increased from 10 to 33, 72, 102, and 180  $\mu\text{J}/\text{cm}^2$ . (b) Plot of the pump-fluence dependence of the optical switching signal for the peak amplitude of the TA-dynamics signals in (a).
